# Supplementary material
Source: publisher figshare collection journal article supplement (https://acs.figshare.com/ndownloader/files/5456690)
Supplement: Supplementary file 1 [file 5456690]

## Sheet: Sheet1
Table S2. Precision docking (Glide, XP mode) of 5E and 5B in PfHsp90
	Ligand / Pose	Chirality	Glide emodel Score	XP GScore		Potential Energy-OPLS-2005	docking score	glide ligand efficiency	glide ligand efficiency sa	glide ligand efficiency ln	glide gscore	glide evdw	glide ecoul	glide energy	glide einternal	XP HBond	glide confnum	glide posenum	glide eff state penalty
	5E (Pose 1)	S	-52.307	-5.751		93.368	-5.627	-0.256	-0.717	-1.375	-5.751	-30.16	-12.663	-42.823	2.285	-0.621	1	5	0.124
	5B (Pose 1) "flipped-in"	R	-63.927	-5.804		158.582	-3.697	-0.116	-0.367	-0.828	-5.804	-40.484	-3.099	-43.582	8.48	-1.387	1	1	2.107
	5B (Pose 2) "flipped-out"	S	-71.652	-4.928		158.735	-2.821	-0.088	-0.28	-0.632	-4.928	-36.775	-16.112	-52.887	4.761	-0.348	1	4	2.107
	5E (Pose 1) was selected for both Glide emodel Score and XP Gscore was top-ranked
	5E (Pose 2) was selected for having the top Glide emodel Score
	5E (Pose 1) was selected for having the top XP Gscore
	OPLS-2005 forcefield was used to prepare the ligands, AMBER99 forcefield was used to prepare the protein model (PfHsp90)
